# Supplementary material for: A comparison of the effectiveness of physical activity and sedentary behaviour interventions in reducing sedentary time in adults: a systematic review and meta-analysis of controlled trials
Source: PubMed Central journal article supplement — Obes Rev. 2014 Aug 11;15(11):905–19. doi: 10.1111/obr.12215 (PMC4233995; doi:10.1111/obr.12215), 2014-08-11
Supplement: obr0015-0905-sd1.pdf [file obr0015-0905-sd1.pdf]

**Table S1** Physical activity intervention study characteristics

| First author                        | Year       | Country       | Age                      | Mean (SD) or range                             | Population | n analysed | Intervention details |                       | Intervention description                                                                                                                                                                                                                                                                                                                                                                                                                                                                                                                                                                                                                                                                                                                                                                    | QA score |
|-------------------------------------|------------|---------------|--------------------------|------------------------------------------------|------------|------------|----------------------|-----------------------|---------------------------------------------------------------------------------------------------------------------------------------------------------------------------------------------------------------------------------------------------------------------------------------------------------------------------------------------------------------------------------------------------------------------------------------------------------------------------------------------------------------------------------------------------------------------------------------------------------------------------------------------------------------------------------------------------------------------------------------------------------------------------------------------|----------|
|                                     |            |               |                          |                                                |            |            | C                    | Focus and length      |                                                                                                                                                                                                                                                                                                                                                                                                                                                                                                                                                                                                                                                                                                                                                                                             |          |
| <b>Controlled trials</b>            |            |               |                          |                                                |            |            |                      |                       |                                                                                                                                                                                                                                                                                                                                                                                                                                                                                                                                                                                                                                                                                                                                                                                             |          |
| Bjerke (18)                         | 2013       | United States | 18-24                    | Undergraduate students                         | 16         | 16         | 28                   | PA only<br>1 semester | Effect of three different kinds of undergraduate courses: APE/CPE students had lectures and labs as well as activities such as trail running/hiking, tennis and volleyball; APE students were in an activities only course such as strength and conditioning and Zumba; CPE students were in Exercise Physiology and consisted of lectures and laboratory activities.                                                                                                                                                                                                                                                                                                                                                                                                                       | 13       |
| De Cocker (35)                      | 2008       | Belgium       | 25-75                    | Community members                              | 440        | 426        | 12 months            | PA only               | Community-wide media campaign using 10,000 steps/d promotion.                                                                                                                                                                                                                                                                                                                                                                                                                                                                                                                                                                                                                                                                                                                               | 11       |
| Taveras (36)                        | 2011       | United States | 32.9 (4.6)               | Mothers with infants                           | 58         | 22         | 6 months             | PA + diet             | Brief discussion by paediatric primary care providers during five routine well child care visits; four individualized coaching and motivational counselling telephone calls with a study health educator; invitation to four group parenting skills training workshops and educational materials.                                                                                                                                                                                                                                                                                                                                                                                                                                                                                           | 18       |
| <b>Randomized controlled trials</b> |            |               |                          |                                                |            |            |                      |                       |                                                                                                                                                                                                                                                                                                                                                                                                                                                                                                                                                                                                                                                                                                                                                                                             |          |
| Abascal (37)                        | 2008       | United States | 41.2 (8.7)<br>43.9 (8.0) | Overweight/obese women<br>Overweight/obese men | 140<br>153 | 146<br>155 | 12 months            | PA + diet             | Women in balance: focused on diet quality and included initial web-based assessment, follow-up via the web, periodic phone and email interaction with a health counselor. Target behaviours included increasing PA (30-60 min goal), fruit and vegetable intake, fibre, decreasing fat. Monthly online modules including goal setting.<br>PACE! Men in Motion: short sessions, use of a pedometer. Monthly web-based activities including learning about and applying new behavioural skills, and reading diet and PA topics. Weekly goals set by the men for: fruit and vegetable intake, dietary fat, fibre, PA, strength training. Given pedometers and encouraged to input data on website. PA goals including steps/d to $\geq 10,000$ and participating in strength training 2x week. | 14       |
| Adams (38)                          | 2012       | United States | 33.0 (8.0)*              | Families from Indian tribes                    | 67         | 83         | 24 months            | Lifestyle             | Healthy Children, Strong Families intervention. Mentored, home-based health lifestyles intervention targeting both American Indian primary caregivers and their 2-5-year-old children to reduce BMI.                                                                                                                                                                                                                                                                                                                                                                                                                                                                                                                                                                                        | 14       |
| Aittasalo (39)                      | 2004       | Finland       | 44.0 (9.0)               | Employees                                      | 52         | 51         | 12 months            | PA only               | Nurse lead counselling focused on individual goals for leisure time PA. Leaflet provided and a weekly PA plan made with a PA diary. Participants in second group performed fitness tests including one-leg standing, side-bending of the trunk, modified push-up, one-leg squat and 2-km walk test.                                                                                                                                                                                                                                                                                                                                                                                                                                                                                         | 19       |
| Aittasalo (40)                      | 2010       | Finland       | 44.1 (9.4)*              | Office workers                                 | 123        | 118        | 6 months             | PA only               | Pedometer-based intervention: 1-h preliminary meeting at worksite including health benefits and recommendations of PA and walking. Use of stairs emphasized. Employees supplied with walking leaflets, pedometers and logbooks. Self-monitoring of PA with the pedometer and logbook and monthly email messages from Occupational Health Care units.                                                                                                                                                                                                                                                                                                                                                                                                                                        | 19       |
| Andersen (29,30)                    | 2012, 2013 | Norway        | 25-60                    | Sedentary Pakistani immigrant men              | 89         | 61         | 5 months             | PA only               | Physical Activity and Minority Health study: structured group exercise, group lectures, individual counselling and phone calls.                                                                                                                                                                                                                                                                                                                                                                                                                                                                                                                                                                                                                                                             | 19       |

**Table S1** *Continued*

| First author    | Year | Country              | Age                      |          | Population                                      | n analysed |       | Intervention details                  |                                                                                                                                                                                                                                                                                                                                     | QA score |
|-----------------|------|----------------------|--------------------------|----------|-------------------------------------------------|------------|-------|---------------------------------------|-------------------------------------------------------------------------------------------------------------------------------------------------------------------------------------------------------------------------------------------------------------------------------------------------------------------------------------|----------|
|                 |      |                      | Mean (SD) or range       |          |                                                 | I          | C     | Focus and length                      | Intervention description                                                                                                                                                                                                                                                                                                            |          |
| Andrews (34)    | 2011 | UK                   | 30-80                    | 246      | Type 2 diabetes                                 | 99         | 246   | PA + diet<br>12 months                | Intensive diet intervention aimed at enabling patients to lose 5–10% of initial body weight. In the diet + PA group patients were asked to do at least 30-min brisk walking on at least 5 d/week. Each patient was given pedometer and log book and PA reviewed every 3 months.                                                     | 22       |
| Baker (41)      | 2010 | Scotland             | 49.2 (8.8)               | 39       | Low SES                                         | 40         | 39    | PA only<br>60 weeks                   | Walking for Well-being in the West: received PA consultation and then followed a 12-week pedometer-based walking programme. First 6 weeks consisted of graduated bi-monthly goals with an aim for the increased walking behaviour to be maintained for the remaining 6 weeks. Overall goal to increase step count by 3,000 steps/d. | 20       |
| Bernaards (42)  | 2008 | Netherlands          | 43.6 (8.7)*              | 156      | Computer workers (neck and upper limb symptoms) | 158        | 156   | PA + work style<br>6 months           | Work style and PA: interactive group meetings focused on behavioural change regarding body posture and workstation adjustment, use of sufficient breaks and work stress and increasing PA.                                                                                                                                          | 20       |
| Bonnefoy (43)   | 2012 | France               | >78                      | 52       | Independent elderly                             | 48         | 52    | PA + diet<br>4 months                 | Patients prescribed exercises, received a booklet explaining how to perform exercises and how to fill in compliance diaries.                                                                                                                                                                                                        | 18       |
| Breyer (44)     | 2010 | Austria              | 60.3 (8.5)               | 30       | COPD                                            | 30         | 30    | PA only<br>3 months                   | Nordic walking; 1 h walking at 75% initial maximum heart rate, 3 times/week.                                                                                                                                                                                                                                                        | 18       |
| Burke (45)      | 2013 | Australia            | 60-70                    | 176      | Seniors                                         | 199        | 176   | PA + diet<br>6 months                 | Physical Activity and Nutrition for Seniors: low-cost, home-based intervention targeting insufficiently active low- to middle-income older adults and a semi-tailored programme to fit individual needs.                                                                                                                            | 19       |
| Carlson (46)    | 2012 | Australia            | 18-56                    | 163      | Overweight/obese                                | 189        | 163   | PA + diet<br>12 months                | Goal was to increase PA to 30-60 min/d 5-7 d/week, $\geq 10,000$ steps per day.                                                                                                                                                                                                                                                     | 9        |
| Chin (47)       | 2006 | Netherlands          | 81.0 (5.6)               | 40       | Older adults in long-term care                  | 41         | 40    | PA only<br>6 months                   | Resistance training: performed 2x week in groups of five to seven participants directed by a trained physical therapist in order to improve muscle strength. Functional training: performed 2x week, led by a physiotherapist. Designed to improve muscle strength, speed, endurance, coordination and flexibility.                 | 17       |
| De Greef (48)   | 2010 | Belgium              | 35-75                    | 20       | Type 2 diabetes                                 | 21         | 20    | Lifestyle<br>12 weeks                 | Lifestyle intervention with five cognitive behavioural group sessions of 90 min. Provided with a pedometer and diary.                                                                                                                                                                                                               | 16       |
| Fitzgibbon (49) | 2005 | United States        | 44.4 (7.9)<br>45.1 (6.9) | 13<br>18 | Obese Black women                               | 14         | 13    | PA + diet + breast health<br>20 weeks | Cohort #1 focused equal time on breast health and weight loss strategies<br>Cohort #2 had greater focus on PA/weight loss.                                                                                                                                                                                                          | 16       |
| Gilson (50)     | 2009 | UK, Spain, Australia | 41.3 (10.1)              | 60       | White collar university employees               | 59         | 60    | PA only<br>10 weeks                   | Two interventions: (i) increase step counts through brisk, sustained, route-based walking during work breaks; (ii) engage in incidental walking and accumulate step counts during working tasks (i.e. walking meetings).                                                                                                            | 16       |
| Hallsworth (31) | 2011 | UK                   | 56.7 (12.9)              | 10       | Sedentary adults                                | 7          | 10    | PA only<br>8 weeks                    | Resistance exercise performed three times per week. Biweekly supervised sessions used to encourage adherence and progression.                                                                                                                                                                                                       | 16       |
| Hansen (32)     | 2012 | Denmark              | 50.0 (13.6)              | 6,055    | Physically inactive                             | 6,232      | 6,055 | PA only<br>16 weeks                   | Web-based intervention founded in theories of stages of change and planned behaviour. Website had three major parts: (i) personal page with individually tailored PA advice and profiler; (ii) page with training programmes and recommendations; and (iii) discussion page for questions.                                          | 17       |

**Table S1** Continued

| First author                            | Year | Country         | Age                |         | Population                               | n analysed |     | Intervention details  |                                                                                                                                                                                                                                                                                              |          | QA score |
|-----------------------------------------|------|-----------------|--------------------|---------|------------------------------------------|------------|-----|-----------------------|----------------------------------------------------------------------------------------------------------------------------------------------------------------------------------------------------------------------------------------------------------------------------------------------|----------|----------|
|                                         |      |                 | Mean (SD) or range | Country |                                          | I          | C   | Focus and length      | Intervention description                                                                                                                                                                                                                                                                     | QA score |          |
| Hijazi (51)                             | 2012 | United States   | 29.6 (9.4)         |         | Hospital employees                       | 30         | 28  | PA + diet<br>40 weeks | Use of smart phone application, MyFitnessPal for: nutritional facts; keeping track of calorie content of foods eaten; and allows participants to track their PA, water intake and any exercise and food notes.                                                                               | 18       |          |
| Hu (62)                                 | 2012 | China           | 20–49              |         | Women with history of GDM                | 192        | 212 | PA + diet<br>4 weeks  | Individualized intervention with goal to increase PA from 15 to 30 min/d.                                                                                                                                                                                                                    | 16       |          |
| Kallings (53)                           | 2009 | Sweden          | 68                 |         | Insufficiently active and obese elderly  | 47         | 54  | PA only<br>6 months   | Patient-centred counselling and individual written PA prescription.                                                                                                                                                                                                                          | 17       |          |
| C. Keller <i>et al.</i> , (unpublished) | 2014 | United States   | 28.3 (5.6)         |         | Post-partum Latinas                      | 39         | 53  | PA only<br>12 weeks   | Madres para la Salud: social support intervention with focus on moderate PA to effect changes in body fat, fat tissue inflammation and depression symptoms in sedentary postpartum Latinas. Conducted in group format and led by trained personnel. Group walking and intervention sessions. | 20       |          |
| Kim (54)                                | 2006 | United States   | 49.9 (7.8)         |         | Women newly diagnosed with breast cancer | 22         | 19  | PA only<br>8 weeks    | Moderate intensity aerobic exercise intervention. Minimum 3 d/week, 30 min/d.                                                                                                                                                                                                                | 17       |          |
| Kozey-Keadle (55)                       | 2014 | United States   | 43.6 (9.9)         |         | At risk for CVD                          | 16         | 8   | PA only<br>12 weeks   | Participants exercise 5 d/week for 12 weeks on a treadmill. Intensity prescribed as percentage of heart rate reserve; each session was 40 min.                                                                                                                                               | 18       |          |
| Lakerveld (56)                          | 2013 | The Netherlands | 30–50              |         | Risk for type 2 diabetes                 | 242        | 248 | Lifestyle<br>6 months | Nurse lead individual counselling focusing on motivational interviewing and problem solving.                                                                                                                                                                                                 | 17       |          |
| Lane (57)                               | 2010 | Ireland         | N/A                |         | Inactive Irish women                     | 85         | 91  | PA only<br>1 time     | Participants provided with a tailored PA booklet.                                                                                                                                                                                                                                            | 17       |          |
| McGowan (20)                            | 2010 | Canada          | 45.7 (8.7)         |         | Relatives of colon cancer patients       | 46         | 28  | PA only<br>9 months   | Home-based intervention designed to follow a 12-week exercise intervention. Participants received emails targeting issues in the adoption and maintenance phase of exercise.                                                                                                                 | 19       |          |
| Morgan (19)                             | 2013 | Australia       | 47.5 (11)          |         | Overweight/ obese men                    | 52         | 54  | PA + diet<br>3 months | Three arms: Resource programme (paper no dietary feedback), Online (internet-based and dietary feedback), wait-list control. SHED-IT: self-help, exercise and diet intervention lasting 3 months with no face-to-face contact focusing on weight loss.                                       | 20       |          |
| Morrison (58)                           | 2013 | UK              | 44.8               |         | Families                                 | 15         | 12  | PA only<br>10 weeks   | Dog-based PA promotion in families.                                                                                                                                                                                                                                                          | 21       |          |
| Mutrie (59)                             | 2012 | UK              | 71.6 (6.0)*        |         | Older adults                             | 20         | 21  | PA only<br>12 weeks   | Two 30-min PA consultations from trained practice nurse, a pedometer and a walking programme. Control continued as normal and received the programme at the end of the 12 weeks.                                                                                                             | 18       |          |
| Opienacker (60)                         | 2008 | Belgium         | 54.5 (12)*         |         | Women                                    | 37         | 42  | PA only<br>5 months   | One intervention meeting, a self-help booklet and monthly reminders. Aim to give women information on why and how to incorporate more PA into their daily lives.                                                                                                                             | 18       |          |
| Papalazarou (61)                        | 2010 | Greece          | 21–45              |         | Obese women vertical banded gastroplasty | 15         | 15  | PA + diet<br>3 years  | Lifestyle intervention with self-monitoring, self-evaluation, goal setting, reinforcement, stimulus control and relapse prevention. Focused on food intake and PA.                                                                                                                           | 17       |          |
| Shaw (62)                               | 2008 | United States   | ≥65                |         | Senior women                             | 13         | 11  | PA only<br>3 months   | Walking for exercise programme using assistive devices as needed to reach a targeted goal of 30 min/d.                                                                                                                                                                                       | 14       |          |

**Table S1** *Continued*

| First author                      | Year | Country         | Age                |  | Population                    | n analysed |     | Intervention details   |                                                                                                                                                                                                                                                                                                                                                                                                                                                                                                       | QA score |
|-----------------------------------|------|-----------------|--------------------|--|-------------------------------|------------|-----|------------------------|-------------------------------------------------------------------------------------------------------------------------------------------------------------------------------------------------------------------------------------------------------------------------------------------------------------------------------------------------------------------------------------------------------------------------------------------------------------------------------------------------------|----------|
|                                   |      |                 | Mean (SD) or range |  |                               | I          | C   | Focus and length       | Intervention description                                                                                                                                                                                                                                                                                                                                                                                                                                                                              |          |
| Slootmaker (63)                   | 2009 | The Netherlands | 31.8 (3.5)         |  | Dutch officer workers         | 38         | 42  | PA only<br>3 months    | Personal activity monitor coupled with simple and concise web-based tailored PA advice.                                                                                                                                                                                                                                                                                                                                                                                                               | 20       |
| Spittaels (64)                    | 2007 | Belgium         | 41.4 (5.6)         |  | Healthy adults                | 103        | 78  | PA only<br>6 months    | Intervention website vs. intervention website + email reminders. The main section of the website included an interactive computer-tailored programme that generated individualized PA advice after completing an assessment questionnaire. Tailored advice lead participants to additional website sections (goal setting, weekly plan, strength and flexibility exercises, start-to-run programme, forum, links and contact information).                                                            | 20       |
| Sternfeld (65)                    | 2009 | United States   | 45.3 (10.2)*       |  | Office employees              | 195        | 436 | PA only<br>4 months    | Website RCT: email delivered intervention designed to increase PA.                                                                                                                                                                                                                                                                                                                                                                                                                                    | 19       |
| Thompson (66)                     | 2008 | United States   | 18–40              |  | American Indian women         | 100        | 100 | PA + diet<br>5 months  | Five discussion group sessions (one meeting per month) focused on healthful eating, PA, goal setting and social support.                                                                                                                                                                                                                                                                                                                                                                              | 18       |
| Wadsworth (69)                    | 2010 | United States   | Unknown            |  | College women                 | 23         | 19  | PA only<br>6 weeks     | Intervention consisted of emails, a website, access to an e-counselor and access to computer-mediated exercise materials. Six weekly emails directed participants to web pages that targeted goal setting, time management, self-monitoring, social support, reinforcements, relapse prevention, realistic expectations of exercise, expectancies of exercise, overcoming barriers to exercise, anticipation of exercise relapse, natural history of exercise and building of exercise self-efficacy. | 15       |
| Walters (67,68)                   | 2012 | Australia       | 68 (8)             |  | COPD                          | 43         | 71  | Lifestyle<br>12 months | Health mentoring by trained nurses including 16 calls for 30 min over 12 months. Participants set medium-term to long-term goals in collaboration with their health mentors using a specified framework of health behaviour targets, namely: smoking, nutrition, alcohol, PA, psychosocial well-being and symptom management.                                                                                                                                                                         | 20       |
| B.M. Winzer et al., (unpublished) | 2014 | Australia       | 57.2 (7.5)         |  | Men with Barrett's oesophagus | 17         | 16  | PA only<br>24 weeks    | 60 min of moderate-intensity aerobic and resistance training, 5 d/week or a control arm (45 min of stretching, 5 d/week) for 24 weeks.                                                                                                                                                                                                                                                                                                                                                                | 17       |

\*Intervention arm mean age (SD).

APE, activities-based education courses; BMI, body mass index; C, control; COPD, chronic obstructive pulmonary disease; CPE, conceptually based courses; CVD, cardiovascular disease; GDM, gestational diabetes mellitus; I, intervention; PA, physical activity; QA, quality assessment; RCT, randomized controlled trial; SB, sedentary behaviour; SD, standard deviation; SES, socio-economic status.

**Table S2** Physical activity and sedentary behaviour study characteristics

| First author                 | Year | Country         | Age<br>Mean (SD) or<br>range | Population                         | n analysed |          | Intervention details        |                                                                                                                                                                                                                                                                                                            | QA<br>score |
|------------------------------|------|-----------------|------------------------------|------------------------------------|------------|----------|-----------------------------|------------------------------------------------------------------------------------------------------------------------------------------------------------------------------------------------------------------------------------------------------------------------------------------------------------|-------------|
|                              |      |                 |                              |                                    | I          | C        | Focus and length            | Intervention description                                                                                                                                                                                                                                                                                   |             |
| Controlled trials            |      |                 |                              |                                    |            |          |                             |                                                                                                                                                                                                                                                                                                            |             |
| Chang (70)                   | 2013 | South Korea     | 66.4 (4.1)                   | Koreans >60 years                  | 27         | 21       | PA + SB<br>8 weeks          | Empowerment intervention consisting of education, exercise and empowerment group discussion.                                                                                                                                                                                                               | 18          |
| Dewa (71)                    | 2009 | Canada          | 45.6 (9.5)                   | Healthcare employees               | 22         | 6        | PA + SB<br>4 weeks          | Workers were provided with pedometers to promote walking, mental health and reduction of SBs.                                                                                                                                                                                                              | 14          |
| Randomized controlled trials |      |                 |                              |                                    |            |          |                             |                                                                                                                                                                                                                                                                                                            |             |
| Adams (27,28)                | 2013 | United States   | 58.5 (12.5)                  | Women weight loss support          | 40         | 24       | PA + SB<br>6 weeks          | Group sessions and email used mastery feedback from goal-setting activities along with behavioural cues and modelling to reduce SB and increase steps.                                                                                                                                                     | 17          |
| Barwais (73)                 | 2013 | Australia       | 27.0 (4.0)                   | Sedentary                          | 18         | 15       | PA + SB<br>4 weeks          | Online personal activity monitor (using triaxial accelerometer) designed to motivate a reduction in SB and increase in PA in the activities of daily living.                                                                                                                                               | 19          |
| De Greef (74)                | 2011 | Belgium         | 35-75                        | Type 2 diabetes                    | 60         | 32       | PA + SB<br>24 weeks         | Face-to-face sessions where participants were provided with a pedometer and then continued telephone support.                                                                                                                                                                                              | 16          |
| Eakin (75)                   | 2010 | Australia       | 20-75                        | Type 2 diabetes                    | 117        | 127      | PA + SB + diet<br>18 months | Telephone-delivered, behavioural weight loss intervention focusing on PA, diet and behavioural therapy including the reduction of SBs.                                                                                                                                                                     | 21          |
| French (76)                  | 2011 | United States   | 41                           | Households                         | 43<br>HH   | 44<br>HH | PA + SB + diet<br>12 months | Family-based intervention to prevent excess weight gain among households. Targeted TV viewing, low PA, consumption of fast foods, prepared snacks and sugar-sweetened beverages. Six monthly face-to-face group sessions, monthly newsletters, 12 home-based activities. TV-limiting device installed.     | 20          |
| Jago (77)                    | 2013 | UK              | Unknown                      | Parents with 6-8-year-old children | 25         | 23       | PA + SB<br>8 weeks          | Parenting programme at community centre (2 h/session). Included topics on active play, screen viewing, motivation, expectation setting for parents, self-esteem, communication, etc.                                                                                                                       | 17          |
| Kozey-Keadle (65)            | 2014 | United States   | 43.6 (9.9)                   | At risk for CVD                    | 16         | 8        | PA + SB arm<br>12 weeks     | Participants exercised 40 min, 5 d/week for 12 weeks on a treadmill. Intensity prescribed as percentage of heart rate reserve. Participants were provided with home, work and discretionary time strategies to increase non-exercise PA and decrease sedentary time. Step goals to increase incidental PA. | 18          |
| Kriska (33)                  | 2012 | N/A             | N/A                          | Type 2 diabetes                    | N/A        | N/A      | Lifestyle<br>N/A            | The Diabetes Prevention Programme: Activity goal of the lifestyle intervention was to achieve 150 min/week of moderate-intensity activity.                                                                                                                                                                 | 4           |
| Lioret (78)                  | 2012 | Australia       | 32.3 (4.3)                   | Mothers with newborns              | 178        | 179      | PA + SB + diet<br>15 months | Focused on parenting skills and behaviours aimed to promote development of healthy eating, physical activity and reduced SB in infants. Dietician-delivered intervention six 2-h sessions.                                                                                                                 | 18          |
| van Berkele (79)             | 2014 | The Netherlands | 46.0 (9.4)*                  | Employees                          | 129        | 128      | PA + SB + diet<br>6 months  | Mindful VIP intervention comprised of 8 weeks of in-company mindfulness training with homework exercises, followed by eight sessions of e-coaching. Behaviours targeted included: vigorous PA in leisure time, sedentary behaviour at work and fruit and vegetable intake.                                 | 19          |
| Verweij (80)                 | 2012 | The Netherlands | 47 (8)                       | Employees                          | 237        | 233      | PA + SB + diet<br>6 months  | Occupational health guideline-based care including increasing PA, reducing SB, increase fruit and vegetable intake, reducing snacking.                                                                                                                                                                     | 20          |

\*Mean age (SD) in intervention arm.

C, control; CVD, cardiovascular disease; HH, households; I, intervention; N/A, not available; PA, physical activity; QA, quality assessment; SB, sedentary behaviour; SD, standard deviation.

**Table S3** Sedentary behaviour study characteristics

| First author                        | Year | Country       | Age                |       | Population                | n analysed |                  | Intervention details     |                                                                                                                                                                                                                                                                                                                                                                                                                                                                                 | QA score |
|-------------------------------------|------|---------------|--------------------|-------|---------------------------|------------|------------------|--------------------------|---------------------------------------------------------------------------------------------------------------------------------------------------------------------------------------------------------------------------------------------------------------------------------------------------------------------------------------------------------------------------------------------------------------------------------------------------------------------------------|----------|
|                                     |      |               | Mean (SD) or range | I     |                           | C          | Focus and length | Intervention description |                                                                                                                                                                                                                                                                                                                                                                                                                                                                                 |          |
| <b>Controlled trials</b>            |      |               |                    |       |                           |            |                  |                          |                                                                                                                                                                                                                                                                                                                                                                                                                                                                                 |          |
| Alkhajah (81)                       | 2012 | Australia     | 20–65              | 18    | Office workers            | 18         | 14               | SB only<br>3 months      | Pilot study using the installation of sit–stand workstations.                                                                                                                                                                                                                                                                                                                                                                                                                   | 17       |
| Healy (82)                          | 2013 | Australia     | 43.2 (10.3)        | 18    | Office workers            | 18         | 18               | SB only<br>4 weeks       | Multi-component intervention with key messaging: Stand up, sit less, move more. Standing tip of the week, dual display sit–stand workstations, health coaches (2x 30-min face-to-face meetings, followed by three calls (once a week). Specific recommendations encouraged participants to stand up every 30 min, sit less by using workstations and equal amounts of sitting and standing time.                                                                                | 21       |
| Pronk (83)                          | 2012 | United States | 38.4 (11.4)*       | 24    | Sedentary employees       | 24         | 10               | SB only<br>4 weeks       | Study to reduce occupational sitting time and improving worker health through the installation of sit–stand workstations.                                                                                                                                                                                                                                                                                                                                                       | 14       |
| <b>Randomized controlled trials</b> |      |               |                    |       |                           |            |                  |                          |                                                                                                                                                                                                                                                                                                                                                                                                                                                                                 |          |
| Carr (84)                           | 2013 | United States | 44.7 (9.6)         | 23    | University workers        | 23         | 17               | SB only<br>12 weeks      | Multi-component intervention: theory-based, Internet-delivered programme, portable pedal machine at work and pedometer. Control was a wait-listed.                                                                                                                                                                                                                                                                                                                              | 19       |
| Gordon (85)                         | 2013 | United States | 45.5 (12.7)        | 13    | Sedentary employees       | 13         | 11               | SB only<br>10 weeks      | Pilot study with primary target to reduce SB by 30 min/d. Intervention used social construct theory relating to decreasing SBs at work. Received emails containing psychosocial materials and other available resources.                                                                                                                                                                                                                                                        | 19       |
| Kozey-Keadle (55)                   | 2014 | United States | 43.6 (9.9)         | 14    | At risk for CVD           | 14         | 8                | SB only arm<br>12 weeks  | Sedentary reduction group were provided with home, work and discretionary time strategies to increase their non-exercise PA and decrease sedentary time. Step goals were used to increase incidental PA.                                                                                                                                                                                                                                                                        | 18       |
| Neuhaus (21)                        | 2014 | Australia     | 42.6 (11.5)        | MC 13 | Desk-based office workers | MC 13      | WO 13            | SB only<br>3 months      | Key messages: 'Stand Up, Sit Less and Move More'. Break up long bouts of sitting ≥30 min. Participants encouraged to substitute sitting with standing or moving time, primarily by using the height adjustable workstation. A sitting-to-standing ratio of ~50:50 was suggested. Multi-component (MC) group received combined organizational, environmental and individual components. Workstation only (WO) group only received the workstations and no further reinforcement. | 21       |
| Otten (86)                          | 2009 | United States | 22–61              | 20    | Overweight/obese          | 20         | 16               | SB only<br>3 weeks       | TV controls whereas those in the intervention group had a limit of 50% of their baseline TV viewing permitted, once the limit was achieved the TV was locked off. Controls continued usual TV viewing habits.                                                                                                                                                                                                                                                                   | 21       |

\*Intervention mean age (SD).

C, control; CVD, cardiovascular disease; I, intervention; PA, physical activity; QA, quality assessment; SB, sedentary behaviour; SD, standard deviation.

**Table S4** Physical activity intervention study results

| Reference                                     | Year       | Intervention    | Sedentary behaviour measure |                 |                                          | Sedentary behaviour results                                                                                                                                                                                                                          |                                   | Intervention effect |
|-----------------------------------------------|------------|-----------------|-----------------------------|-----------------|------------------------------------------|------------------------------------------------------------------------------------------------------------------------------------------------------------------------------------------------------------------------------------------------------|-----------------------------------|---------------------|
| First author                                  | Year       | Focus           | Measure                     | Domain          | Units                                    |                                                                                                                                                                                                                                                      |                                   |                     |
| Controlled studies<br>Bjerke* (18)            | 2013       | PA only         | IPAQ                        | Sitting time    | Mean min/d                               | No changes were observed in the activities-based intervention. Both the activities/conceptually based course and the course-based (control) groups had a non-significant increase in sitting time.                                                   | -                                 |                     |
| De Cocker (35)                                | 2008       | PA only         | IPAQ                        | Sitting time    | Mean min/d                               | Intervention group had a significant reduction across all domains of sedentary time. Control had a significant increase across all domains.                                                                                                          | Total +<br>Weekday +<br>Weekend + |                     |
| Taveras (36)                                  | 2011       | PA + diet       | Questionnaire               | TV time         | Mean h/d                                 | No significant difference between intervention and control                                                                                                                                                                                           | -                                 |                     |
| Randomized controlled studies<br>Abascal (37) | 2008       | PA + diet       | SBI                         | Sedentary time  | Mean h/d                                 | No significant difference between intervention and control – both had no change in sedentary time.                                                                                                                                                   | -                                 |                     |
| Adams, A* (38)                                | 2012       | Lifestyle       | Questionnaire               | TV viewing      | Mean min/d                               | No significant difference between intervention and control – both had a significant decrease.                                                                                                                                                        | -                                 |                     |
| Aittasalo (39)                                | 2004       | PA only         | IPAQ                        | Sitting         | Mean min/workday<br>Mean min/non-workday | No significant difference between intervention and control during workdays or non-work days – the fitness testing group had a significant reduction in non-workday sitting compared with the counselling only group.                                 | Workday –<br>Non-work –           |                     |
| Aittasalo (40)                                | 2012       | PA only         | IPAQ                        | Sitting         | Mean min/workday<br>and /non-workday     | No significant difference between intervention and control during workdays or non-work days                                                                                                                                                          | Workday –<br>Non-work –           |                     |
| Andersen (29,30)                              | 2012, 2013 | PA only         | Accelerometer               | Sedentary time  | Mean min/d                               | Post intervention (5 months): non-significant reduction in both intervention and control groups.<br>Long-term follow-up (11 months): intervention group had a significant reduction in sedentary time. Control group had a non-significant increase. | Short term –<br>Long term +       |                     |
| Andrews* (34)                                 | 2011       | PA + diet       | Accelerometer               | Sedentary time  | Mean min/d                               | Intervention group had a significant reduction in sedentary time. Control had a non-significant increase.                                                                                                                                            | +                                 |                     |
| Baker (41)                                    | 2008, 2010 | PA only         | IPAQ                        | Sitting time    | Median min/d                             | Intervention group had a significant reduction in sitting time. Control had a non-significant decrease.                                                                                                                                              | Total time +<br>Weekend +         |                     |
| Bernaards (42)                                | 2008       | PA + work style | Questionnaire               | Reported breaks | Percent reporting breaks                 | Intervention group had significant increase in reported breaks over the control group.                                                                                                                                                               | +                                 |                     |
| Bonnefoy (43)                                 | 2012       | PA + diet       | PASE                        | Sitting >4 h/d  | Percentage                               | No significant difference between intervention and control – both had a decrease pre-post.                                                                                                                                                           | -                                 |                     |
| Breyer (44)                                   | 2010       | PA only         | Accelerometer               | Sitting time    | Mean min/d                               | Intervention group had a significant reduction in sedentary time. Control had a non-significant increase.                                                                                                                                            | +                                 |                     |
| Burke* (45)                                   | 2013       | PA + diet       | IPAQ                        | Sitting time    | Mean min/week                            | Intervention group had a significant reduction in sedentary time. Control had a non-significant increase.                                                                                                                                            | +                                 |                     |
| Carlson (46)                                  | 2012       | PA + diet       | Accelerometer               | Sedentary time  | Median min/d                             | No significant difference between intervention and control – both had no change in sedentary time.                                                                                                                                                   | -                                 |                     |
| Chin (47)                                     | 2006       | PA only         | Accelerometer               | Sitting time    | Median h/d                               | No significant difference between intervention and control – all groups had no significant change in sitting time.                                                                                                                                   | -                                 |                     |

**Table S4** *Continued*

| Reference                       | Intervention |                           | Sedentary behaviour measure |                            |                      | Sedentary behaviour results |                                                                                                                                                                                                                                                                                                          |                                          | Intervention effect |
|---------------------------------|--------------|---------------------------|-----------------------------|----------------------------|----------------------|-----------------------------|----------------------------------------------------------------------------------------------------------------------------------------------------------------------------------------------------------------------------------------------------------------------------------------------------------|------------------------------------------|---------------------|
|                                 | Year         | Focus                     | Length                      | Measure                    | Domain               | Units                       |                                                                                                                                                                                                                                                                                                          |                                          |                     |
| De Greef (48)                   | 2010         | PA only                   | 12 weeks                    | Accelerometer              | Sedentary time       | Mean min/d                  | Intervention group had a significant reduction in sedentary time. Control had no change.                                                                                                                                                                                                                 | +                                        |                     |
| Fitzgibbon (49)                 | 2005         | PA + diet + breast health | 20 weeks                    | Questionnaire              | TV viewing           | Mean h/d                    | No significant difference between intervention and control – both had no change in TV viewing.                                                                                                                                                                                                           | -                                        |                     |
| Gilson (50)                     | 2009         | PA only                   | 10 weeks                    | Questionnaire              | Sitting time at work | Mean min/workday            | No significant difference between intervention and control – both had no change in sedentary time.                                                                                                                                                                                                       | -                                        |                     |
| Hallsworth* (31)                | 2011         | PA only                   | 8 weeks                     | Accelerometer              | Sedentary time       | Mean min/d                  | No significant difference between intervention and control – both had a non-significant decline in sedentary time.                                                                                                                                                                                       | -                                        |                     |
| Hansen (32)                     | 2012         | PA only                   | 16 weeks                    | IPAQ                       | Sitting time         | Median min/d                | No significant difference between intervention and control – both had no change in sitting time.                                                                                                                                                                                                         | -                                        |                     |
| Hijazi (51)                     | 2012         | PA + diet                 | 40 weeks                    | Sedentary Behaviour Survey | Sedentary time       | Mean h/week                 | No significant difference between intervention and control – both had a significant decline in sedentary time.                                                                                                                                                                                           | -                                        |                     |
| Hu (62)                         | 2012         | PA + diet                 | 4 weeks                     | Questionnaire              | Sitting time         | Mean h/d                    | Intervention group had a significant reduction in sitting time. Control had a non-significant increase.                                                                                                                                                                                                  | +                                        |                     |
| Kallings (53)                   | 2009         | PA only                   | 6 months                    | IPAQ                       | Sitting time         | Median h/d                  | No significant difference between intervention and control – both had a significant decrease.                                                                                                                                                                                                            | -                                        |                     |
| C. Keller et al., (unpublished) | 2014         | PA only                   | 12 weeks                    | Accelerometer              | Sedentary time       | Mean min/d                  | No significant difference between intervention and control – both had a non-significant decline in sedentary time.                                                                                                                                                                                       | -                                        |                     |
| Kim (54)                        | 2006         | PA only                   | 8 weeks                     | 7-d PA questionnaire       | Sedentary activity   | Mean h/week                 | No significant difference between intervention and control groups – intervention had a significant decline. Control group had non-significant decline.                                                                                                                                                   | -                                        |                     |
| Kozey-Keadle (55)               | 2014         | PA only arm               | 12 weeks                    | ActivPAL                   | Sedentary time       | % of day                    | Intervention group had a significantly greater reduction in sedentary time. Control had a significant increase.                                                                                                                                                                                          | +                                        |                     |
| Lakerveld* (56)                 | 2013         | Lifestyle                 | 6 months                    | Questionnaire              | Sedentary time       | Mean min/d                  | Post intervention (6 months): no significant difference between intervention and control – intervention had a non-significant increase in sedentary time. Control group had non-significant decline                                                                                                      | Short-term –<br>Midterm –<br>Long-term – |                     |
| Lane (57)                       | 2010         | PA only                   | 1 time                      | Questionnaire              | Sitting time         | Mean min/week               | Midterm follow-up (12 months): no significant difference between intervention and control – both had a non-significant decline in sedentary time. Long-term follow-up (24 months): no significant difference between intervention and control – control group had significant decline in sedentary time. | -                                        |                     |
| McGowan* (20)                   | 2010         | PA only                   | 9 months                    | Accelerometer              | Sedentary time       | Mean min/week               | No significant difference between intervention and control                                                                                                                                                                                                                                               | -                                        |                     |
| Morgan (19)                     | 2013         | PA + diet                 | 3 months                    | Sitting questionnaire      | Sitting time         | Mean min/d                  | No significant difference between intervention and control – intervention had a non-significant decrease in sedentary time. Control group had a non-significant increase                                                                                                                                 | -                                        |                     |
| Morrison (58)                   | 2013         | PA only                   | 10 weeks                    | Accelerometer              | Sedentary time       | % of time                   | No significant difference between intervention and control – both groups had no change.                                                                                                                                                                                                                  | -                                        |                     |
| Mutrie (59)                     | 2012         | PA only                   | 12 weeks                    | ActivPAL                   | Sedentary time       | Mean min/d                  | Intervention group had a significant reduction in sedentary time. Control had a non-significant increase.                                                                                                                                                                                                | +                                        |                     |



**Table S4** *Continued*

| Reference                                  | Intervention |           | Sedentary behaviour measure |                                   |                | Sedentary behaviour results |                                                                                                                                                                                                                                                                                                                                                                                                                                  |                                          | Intervention effect |
|--------------------------------------------|--------------|-----------|-----------------------------|-----------------------------------|----------------|-----------------------------|----------------------------------------------------------------------------------------------------------------------------------------------------------------------------------------------------------------------------------------------------------------------------------------------------------------------------------------------------------------------------------------------------------------------------------|------------------------------------------|---------------------|
|                                            | Year         | Focus     | Length                      | Measure                           | Domain         | Units                       |                                                                                                                                                                                                                                                                                                                                                                                                                                  |                                          |                     |
| Opdenacker (60)                            | 2008         | PA only   | 5 months                    | IPAQ                              | Sitting time   | Mean min/week               | No significant difference between intervention and control – intervention had a non-significant decrease and control group had a non-significant increase in sitting time.                                                                                                                                                                                                                                                       | –                                        |                     |
| Papalazarou* (61)                          | 2010         | PA + diet | 3 years                     | N/A                               | TV time        | Mean h/d                    | Early intervention (3 months): intervention had a significant decrease in TV time, control group had non-significant decrease.<br>Midterm follow-up (12 months): intervention had a significant decrease in TV time, control group had non-significant decrease.<br>Long-term follow-up (36 months): intervention had a significant decrease in TV time, control group had non-significant decrease.                             | Short-term +<br>Midterm +<br>Long-term + |                     |
| Shaw (62)                                  | 2008         | PA only   | 3 months                    | YPAS                              | Sitting index  | Mean h/d                    | No significant difference between intervention and control                                                                                                                                                                                                                                                                                                                                                                       | –                                        |                     |
| Slootmaker (63)                            | 2009         | PA only   | 3 months                    | AQUAA                             | Sedentary time | Median min/week             | No significant difference between intervention and control                                                                                                                                                                                                                                                                                                                                                                       | –                                        |                     |
| Spittaels (64)                             | 2007b        | PA only   | 6 months                    | IPAQ                              | Sitting time   | Mean min/d                  | Weekday sitting: both intervention groups had a significant decrease in weekday sitting time, control group had non-significant increase.<br>Weekend sitting: no difference was between intervention and control – all groups had a decrease in weekend sitting time.                                                                                                                                                            | Weekday sitting +<br>Weekend sitting –   |                     |
| Sternfeld* (65)                            | 2009         | PA only   | 4 months                    | Questionnaire                     | Sedentary time | Mean min/week               | Immediate post-intervention: intervention group had a significantly greater reduction in sedentary time.<br>4-month post-intervention: intervention group had a greater reduction in sedentary time that approached significance ( $P = 0.06$ ).                                                                                                                                                                                 | Immediate +<br>4-month –                 |                     |
| Thompson* (66)                             | 2008         | PA + diet | 5 months                    | Modifiable Activity Questionnaire | TV time        | Mean h/d                    | Short-term follow-up (6 months): no significant difference between intervention and control – both had a significant decrease in TV time<br>Midterm follow-up (12 months): no significant difference between intervention and control – both had a significant decrease in TV time.<br>Long-term follow-up (18 months): no significant difference between intervention and control – both had a significant decrease in TV time. | Short-term –<br>Midterm –<br>Long-term – |                     |
| Wadsworth* (69)                            | 2010         | PA only   | 6 weeks                     | IPAQ                              | Sitting time   | Mean min/week               | Immediate post-intervention: no significant difference between intervention and control – intervention had a significant decrease and control had a non-significant increase.<br>Six-month post-intervention: intervention group had a non-significant reduction in sitting time and control had a significant increase in sitting time. The difference between groups approached significance ( $P = 0.06$ ).                   | Immediate –<br>6-month –                 |                     |
| Walters* (67,68)                           | 2012         | Lifestyle | 12 months                   | Accelerometer                     | Sedentary time | Mean min/d                  | No significant difference between intervention and control – both groups had non-significant declines.                                                                                                                                                                                                                                                                                                                           | –                                        |                     |
| B.M. Winzer <i>et al.</i> , (unpublished)* | 2014         | PA only   | 24 weeks                    | IPAQ                              | Sitting time   | Mean h/week                 | No significant difference between intervention and control – intervention group had non-significant decrease; control group had a non-significant increase in sitting time.                                                                                                                                                                                                                                                      | –                                        |                     |

\*Includes unpublished results from personal communication with author.

+; represents interventions that had a significant reduction in SBs compared with the control group; –, represents interventions that were no significantly different than the control group;

AQUAA, Activity Questionnaire for Adolescents and Adults; IPAQ, International Physical Activity Questionnaire; PA, physical activity; SB, sedentary behaviour; SBI, Sedentary Behaviors Inventory; YPAS, Yale Physical Activity Survey.

**Table S5** Physical activity and sedentary behaviour intervention study results

| Reference                                  | Intervention |                     | Sedentary behaviour measurement |                                          |                                   | Sedentary behaviour results | Intervention effect                                                                                                                                                                                          |
|--------------------------------------------|--------------|---------------------|---------------------------------|------------------------------------------|-----------------------------------|-----------------------------|--------------------------------------------------------------------------------------------------------------------------------------------------------------------------------------------------------------|
|                                            | Year         | Focus               | Length                          | Measure                                  | Domain                            |                             |                                                                                                                                                                                                              |
| <b>Controlled trials</b>                   |              |                     |                                 |                                          |                                   |                             |                                                                                                                                                                                                              |
| Chang (70)                                 | 2013         | PA + SB             | 8 weeks                         | IPAQ                                     | Sitting time                      | Mean min/week               | Intervention group had a significantly greater reduction in sitting time. Control had a non-significant decrease.                                                                                            |
| Dewa* (71)                                 | 2009         | PA + SB             | 4 weeks                         | IPAQ                                     | Sitting time                      | Mean min/weekday            | No significant difference between intervention and control groups – the intervention group had a significant reduction; the control had a non-significant increase.                                          |
| <b>Randomized controlled trials</b>        |              |                     |                                 |                                          |                                   |                             |                                                                                                                                                                                                              |
| Adams, M* (28)                             | 2013         | PA + SB             | 6 weeks                         | Sitting time inventory and accelerometer | weekly sitting and sedentary time | Mean h/week                 | No significant difference between intervention and control groups – intervention group had significant reductions in self-reported sitting time, but no significant changes in accelerometer sedentary time. |
| Anand (72)                                 | 2007         | PA + SB + diet      | 6 months                        | IPAQ                                     | Screen time                       | Mean h/d                    | No significant difference between intervention and control groups – both had non-significant reductions.                                                                                                     |
| Barwais (73)                               | 2013         | PA + SB             | 4 weeks                         | Sedentary log                            | Sedentary time                    | Mean h/d                    | Intervention group had a significantly greater reduction in sitting time. Control had a non-significant increase.                                                                                            |
| De Greef (74)                              | 2011         | PA + SB             | 24 weeks                        | IPAQ and Accelerometer                   | Sitting time and sedentary time   | Mean min/d                  | Intervention group had significantly greater reductions in self-reported sitting time and accelerometer-measured sedentary time compared with the control group.                                             |
| Eakin* (75)                                | 2010         | PA + SB + diet      | 18 months                       | Accelerometer                            | Sedentary time                    | Mean min/d                  | No significant difference between intervention and control groups – control group had a significant increase in sedentary time.                                                                              |
| French (76)                                | 2011         | PA + SB + diet      | 12 months                       | Questionnaire                            | TV viewing                        | Mean h/d                    | Intervention group had significantly greater reductions in TV time compared with an increase in the control group.                                                                                           |
| Jago (77)                                  | 2013         | PA + SB             | 8 weeks                         | Questionnaire                            | TV time                           | % <2 h/d                    | Intervention group had significantly greater reductions in TV time compared with the control group.                                                                                                          |
| Kozey-Keadle (55)                          | 2014         | PA + SB arm         | 12 weeks                        | ActivPAL                                 | Sedentary time                    | % of day                    | Intervention group had a significant reduction in sedentary time. Control had a significant increase.                                                                                                        |
| Kriska (33)                                | 2012         | Lifestyle (PA + SB) | N/A                             | Questionnaire                            | Sitting at work and TV time       | Mean h/week                 | Intervention group had a significant reduction in sitting time at work and TV time. Control had a non-significant increase.                                                                                  |
| Lioret (78)                                | 2012         | PA + SB + diet      | 15 months                       | Questionnaire                            | Sedentary time                    | Mean min/d                  | No significant difference between intervention and control groups – both groups had a decrease in sedentary time.                                                                                            |
| van Berkel* (79)                           | 2014         | PA + SB + diet      | 6 months                        | Questionnaire                            | Sedentary time at work            | Mean min/week               | Post intervention (6 months): No significant difference between intervention and control groups.<br>Midterm follow-up (12 months): No significant difference between intervention and control groups.        |
| Verweij (80)                               | 2012         | PA + SB + diet      | 6 months                        | Questionnaire                            | Sedentary time                    | Mean min/d                  | No significant difference between intervention and control groups – the intervention group had a significant reduction; the control had a non-significant decrease.                                          |
| Total – Leisure time – Workday + Weekend – |              |                     |                                 |                                          |                                   |                             |                                                                                                                                                                                                              |

\*Includes unpublished results from personal communication with author.

+, represents interventions that had a significant reduction in SBs compared with the control group; –, represents interventions that were no significantly different than the control group; IPAQ, International Physical Activity Questionnaire; PA, physical activity; SB, sedentary behaviour.

**Table S6** Sedentary behaviour intervention study results

| Reference                                 | Intervention | Sedentary behaviour measurement |          |                                        | Sedentary behaviour results                     |                                          |                                                                                                                                                                                                                                                                                                                   | Intervention effect                 |
|-------------------------------------------|--------------|---------------------------------|----------|----------------------------------------|-------------------------------------------------|------------------------------------------|-------------------------------------------------------------------------------------------------------------------------------------------------------------------------------------------------------------------------------------------------------------------------------------------------------------------|-------------------------------------|
| First author                              | Year         | Focus                           | Length   | Measure                                | Domain                                          | Units                                    |                                                                                                                                                                                                                                                                                                                   |                                     |
| Controlled trials<br>Alkhajah (81)        | 2012         | SB only                         | 3 months | ActivPAL                               | Sitting time at work and total day              | Mean min/total 16-h day and /8 h workday | Intervention group had a significant reduction in workday (8-h) and total day (16-h) sitting time. Control had a non-significant decrease.                                                                                                                                                                        | Total day + Workday +               |
| Healy* (82)                               | 2013         | SB only                         | 4 weeks  | ActivPAL                               | Sitting time                                    | Mean min/ 8-h workday                    | Intervention group had a significant reduction in sitting time. Control had a non-significant increase.                                                                                                                                                                                                           | Workday +                           |
| Pronk (83)                                | 2012         | SB only                         | 4 weeks  | Questionnaire                          | Sitting time at work                            | Mean min/d                               | Post intervention (5 weeks): Intervention group had a significant reduction; the control had a non-significant increase.<br>Short-term follow-up (7 weeks): no significant difference between intervention and control groups. Both groups significantly increased their sitting time (after desks were removed). | Post + Short-term –                 |
| Randomized controlled trials<br>Carr (84) | 2013         | SB only                         | 12 weeks | StepWatch                              | Sedentary time                                  | Mean min/d % time sedentary              | Intervention group had a significant reduction in min/d of sedentary time and non-significant reduction in % day sedentary. Control had a significant increase in minutes and non-significant decline in % day sedentary.                                                                                         | Minutes + % of time –               |
| Gordon (85)                               | 2013         | SB only                         | 10 weeks | ActivPAL, ActiGraph, IPAQ, SBQ         | Sitting time at work Sedentary time (ActiGraph) | Mean min/8-h work day                    | No significant difference between intervention and control groups (approached significance for ActiGraph $P = 0.06$ ) – both groups had a reduction in sedentary time.                                                                                                                                            | ActivPAL – ActiGraph – IPAQ – SBQ – |
| Kozey-Keadle (55)                         | 2014         | SB only arm                     | 12 weeks | ActivPAL                               | Sedentary time                                  | % of day                                 | Intervention group had a significant reduction in sedentary time. Control had a significant increase.                                                                                                                                                                                                             | +                                   |
| Neuhaus (21)                              | 2014         | SB only                         | 3 months | ActivPAL                               | Sitting time                                    | Mean min/8-h work day                    | Intervention group had significantly greater reduction in sitting time at work than the control group.                                                                                                                                                                                                            | +                                   |
| Otten (86)                                | 2009         | SB only                         | 3 weeks  | TV monitor SenseWear Pro accelerometer | TV time Sedentary time                          | h/d % of day                             | Intervention group had significantly greater reduction in TV viewing time and reduction in % time spent sedentary than the control group.                                                                                                                                                                         | TV monitor + Accelerometer +        |

\*Includes unpublished results from personal communication with author.

+, represents interventions that had a significant reduction in SBs compared with the control group; –, represents interventions that were no significantly different than the control group; IPAQ, International Physical Activity Questionnaire; PA, physical activity; SB, sedentary behaviour; SBQ, Sedentary Behaviour Questionnaire.
